# Supplementary material
Source: Springer Nature journal article supplement (https://www.springermedizin.de/resource/supplementary/12957_2013_1625_MOESM2_ESM.pdf/9563078)

**FADD expression**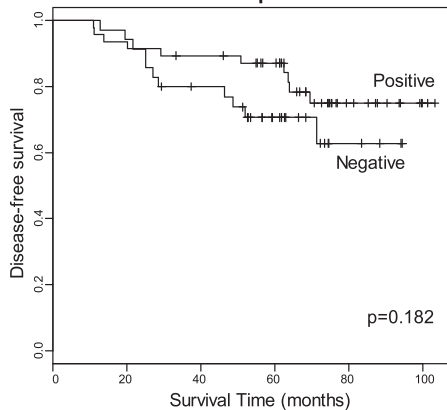**PFPIA1 expression**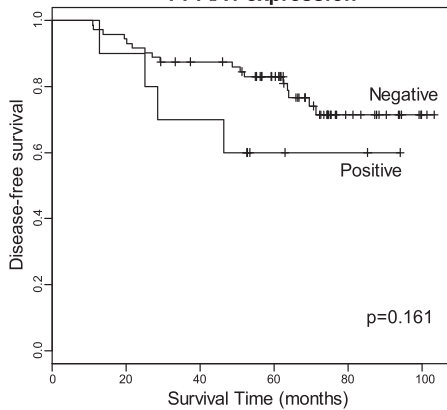**TMEM16A expression**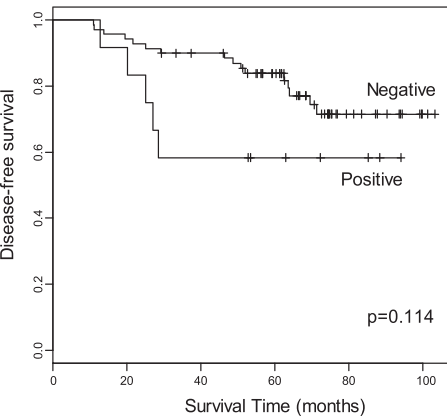**hazard score**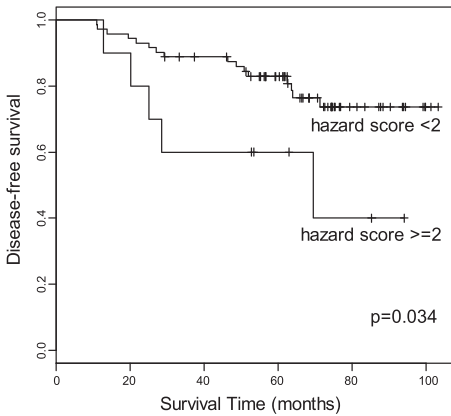

Supplement: MOESM2 [file 9563078]
